# Supplementary material for: Subtypes of atrial fibrillation with concomitant valvular heart disease derived from electronic health records: phenotypes, population prevalence, trends and prognosis
Source: PubMed Central journal article supplement — Europace. 2019 Aug 13;21(12):1776–84. doi: 10.1093/europace/euz220 (PMC6888023; doi:10.1093/europace/euz220), 2019-08-13
Supplement: euz220_supplementary_appendix.pdf [file euz220_supplementary_appendix.pdf]

## SUPPLEMENTARY APPENDIX

We identified relevant codes (for stenosis and regurgitation of mitral, aortic, tricuspid and pulmonary valves as well as associated repairs and replacements) for diagnosis, procedure and prescription by sourcing code lists from prior studies (1-3), running updated valve code searches (enabling contemporary codes lists to allow comparison with more recent data) and by matching synonymous codes between the Read, ICD 10 and OPCS4 controlled clinical terminologies. Diagnosis terms were available to describe stenosis, regurgitation and other and unspecified disorders of the mitral, aortic, tricuspid, pulmonary, and unspecified heart valves with a limited number of codes specifying if the disorder was of rheumatic or non-rheumatic origin. Procedure codes were available to describe mechanical heart valve replacements (i.e. codes referring to mechanical or artificial valves, Starr prosthesis, and Bjork-Shiley prosthesis), bioprosthetic heart valve replacements (i.e. codes relating to allografts, xenografts, Carpentier and Edwards prosthesis) and unspecified heart valve replacements, and valvuloplasty (valvotomy), annuloplasty and other and unspecified valve repairs and operations specific to each of the four, and unspecified, heart valves. All identified terms were independently reviewed for inclusion by two authors (VA and AB).

We implemented EHR phenotype algorithms identifying individuals with AF and VHD both prevalent at baseline (i.e. first VHD code recorded at any time point in an individual's medical record before study entry) and incident over follow up (i.e. first VHD code recorded after AF diagnosis). For every individual, the earliest date for a VHD code was recorded. A hierarchy was created for classification of individuals into one VHD category at baseline based on perceived clinical importance (**figure 1**), considering in order: valve replacements, valve repairs, followed by valve diseases: mitral stenosis, AS, mitral regurgitation and aortic regurgitation (diseases of tricuspid and pulmonary valves were excluded due to limited numbers of events), supported by the ROCKET-AF subgroup analysis(4). For unspecified valve replacement codes, we investigated whether combining information on age at valve replacement and subsequent OAC prescription (i.e. key criteria influencing choice of valve replacement)(5) could be used to infer type of valve replacement (mechanical or bioprosthetic).

Among 676 individuals with incident heart valve replacements, 570 (84.3%) were mechanical or bioprosthetic replacements; 106 (15.7%) were unspecified. (**figure S2**). Among 4,128 individuals with incident VHD, 316 (7.7%) had rheumatic valve disease, 359 (8.7%) had non-rheumatic disease, but for the majority (3637, 88.1%), the rheumatic basis of VHD was unspecified (**figure S3**). For individuals with incident heart valve replacements, there were differences in age distributions at heart valve replacement (**figure S4**) and in the proportion with warfarin prescriptions at 6 months post-valve surgery. The median (IQR) ages for mechanical, bioprosthetic and unspecified heart valve replacements were 70.1 (62.2-75.8), 75.8 (72.2-80.8), and 75.1 (65.7-81.1) years respectively. The proportions with warfarin prescriptions for mechanical, bioprosthetic and unspecified heart valve replacements were 74.3%, 52.1% and 57.6% respectively. Based on these insights it could be inferred that individuals <70 years were likely to have a mechanical valve replacement and individuals >75 years were likely to have

a bioprosthetic valve replacement. For individuals 70-75 years, where the age distribution for mechanical and bioprosthetic replacements overlap, warfarin prescriptions (36 codes) were used to infer a mechanical valve replacement and no warfarin prescription to infer a bioprosthetic valve replacement.

## References

1. Morley KI, Wallace J, Denaxas SC, Hunter RJ, Patel RS, Perel P, et al. Defining disease phenotypes using national linked electronic health records: a case study of atrial fibrillation. *PLoS One*. 2014;9(11):e110900.
2. Rahimi K, Mohseni H, Otto CM, Conrad N, Tran J, Nazarzadeh M, et al. Elevated blood pressure and risk of mitral regurgitation: A longitudinal cohort study of 5.5 million United Kingdom adults. *PLoS Med*. 2017;14(10):e1002404.
3. Lane DA, Skjoth F, Lip GYH, Larsen TB, Kotecha D. Temporal Trends in Incidence, Prevalence, and Mortality of Atrial Fibrillation in Primary Care. *J Am Heart Assoc*. 2017;6(5).
4. Breithardt G, Baumgartner H, Berkowitz SD, Hellkamp AS, Piccini JP, Lokhnygina Y, et al. Native valve disease in patients with non-valvular atrial fibrillation on warfarin or rivaroxaban. *Heart*. 2016;102(13):1036-43.
5. Bloomfield P. Choice of heart valve prosthesis. *Heart (British Cardiac Society)*. 2002;87(6):583-9.

**Table S1 Code lists for atrial fibrillation with concomitant VHD: 235 Read, 49 ICD10 and 86 OPCS-4 and 36 BNF codes**

| <b>Valvular atrial fibrillation</b>     |         |         |         |         |         |         |         |         |         |     |
|-----------------------------------------|---------|---------|---------|---------|---------|---------|---------|---------|---------|-----|
| <b>Valvular heart disease</b>           |         |         |         |         |         |         |         |         |         |     |
| <b>Read:</b>                            | G540.16 | G541100 | G541212 | G541200 | G11..00 | G540.15 | G542000 | G110.00 | G541300 | 9   |
| G543300                                 | G542.00 | G540.00 | G541.00 | G540000 | G54z500 | G543215 | G121.12 | G130.00 | G140413 | 19  |
| G120.00                                 | G540.14 | G541500 | G13..00 | G54z100 | G541012 | G541400 | G133.12 | G543.00 | G543100 | 29  |
| G541000                                 | G543012 | G543011 | G140.00 | G11..11 | G131.14 | G12..00 | G544200 | G541z00 | G544100 | 39  |
| G543z00                                 | G111.11 | G140111 | G54z013 | G111.12 | G543000 | G540z00 | G113.00 | G54..11 | G13z.00 | 49  |
| G11z.00                                 | G541600 | G140000 | G133.00 | G132.12 | G540200 | G121.00 | G110.11 | G132.00 | G132.13 | 59  |
| G540100                                 | G140412 | G543400 | G542012 | G542100 | G141z00 | G543213 | G54z000 | G540300 | G544.00 | 69  |
| G544000                                 | G540.12 | G140400 | G140112 | G121.11 | G542z00 | G141.00 | G112.13 | G112.00 | G543200 | 79  |
| G541011                                 | Gyu5600 | G131.00 | G140514 | G12z.00 | G112.12 | G111.00 | G542200 | Gyu1000 | Gyu5800 | 89  |
| G141100                                 | G140300 | G544X00 | G114.00 | G541211 | G140100 | G131.13 | G543311 | G14021Y | G141000 | 99  |
| G122.00                                 | A932.11 | G13y.00 | Gyu5A00 | G140500 | G140z00 | G54z014 | G14021X | G140200 | Gyu1100 | 109 |
| G133.11                                 | G542011 | G542X00 | Gyu5500 | Gyu1200 | Gyu5D00 | Gyu5B00 |         |         |         | 116 |
| <b>ICD10:</b>                           | I05     | I050    | I051    | I052    | I058    | I059    | I06     | I060    | I061    | 125 |
| I062                                    | I068    | I069    | I07     | I070    | I071    | I072    | I078    | I079    | I08     | 135 |
| I080                                    | I081    | I082    | I083    | I088    | I089    | I34     | I340    | I341    | I342    | 145 |
| I348                                    | I349    | I35     | I350    | I351    | I352    | I358    | I359    | I36     | I360    | 155 |
| I361                                    | I362    | I368    | I369    | I37     | I370    | I371    | I372    | I378    | I379    | 165 |
| <b>Mechanical valve replacements</b>    |         |         |         |         |         |         |         |         |         |     |
| <b>Read:</b>                            | 7914200 | 14T3.00 | 7910200 | ZV43300 | 7910211 | 7911200 | 7914212 | ZV45H00 | 7910212 | 174 |
| 7913200                                 | 7912200 |         |         |         |         |         |         |         |         | 176 |
| <b>OPCS4</b>                            | K253    | K263    | K273    | K283    | K293    |         |         |         |         | 181 |
| <b>Bioprosthetic valve replacements</b> |         |         |         |         |         |         |         |         |         |     |
| <b>Read:</b>                            | 7911100 | 7911000 | 7913000 | 7914211 | 7910213 | 7910100 | 7914100 | 7914000 | 7910214 | 190 |
| 7913100                                 | 7910000 | 7912000 | 7912100 |         |         |         |         |         |         | 194 |
| <b>OPCS4:</b>                           | K251    | K252    | K261    | K262    | K271    | K272    | K281    | K282    | K291    | 203 |
| K292                                    |         |         |         |         |         |         |         |         |         | 204 |
| <b>Unspecified valve replacements</b>   |         |         |         |         |         |         |         |         |         |     |
| <b>Read:</b>                            | 7911.12 | 7910300 | 7910.12 | 7914300 | 14S4.00 | 7911300 | ZV42200 | 7914.11 | 7912300 | 213 |
| 7913.12                                 | 7912.11 | 7913300 | 7911500 |         |         |         |         |         |         | 217 |
| <b>OPCS4:</b>                           | K254    | K264    | K274    | K284    | K294    | K357    |         |         |         | 223 |
| <b>Valve repairs</b>                    |         |         |         |         |         |         |         |         |         |     |
| <b>Read:</b>                            | 791z.00 | 7918.00 | 7N40000 | 7910.00 | 7N40.00 | 7N40100 | 7918000 | 7911.00 | 7N40300 | 232 |
| 7N40200                                 | 7914z00 | 7916z11 | 7916.11 | 7916100 | 7915000 | 7916000 | 7917000 | 7917z00 | 7910400 | 242 |
| 7918100                                 | 7912.00 | 7917.11 | 7916300 | 7913.11 | 791..00 | 7918200 | 7911.11 | 7910.11 | 7919300 | 252 |
| 7917300                                 | 7919100 | 7915300 | 7919.11 | 7911y00 | 7910z00 | 7915.00 | 7917100 | 7918y00 | 7915100 | 262 |
| 7913.00                                 | 791y.00 | 7918z00 | 7916.00 | 7914400 | 7913400 | 7917311 | 7911400 | 7918111 | 7919000 | 272 |
| 7911z00                                 | 7919400 | 7910y00 | 7914.00 | 7915200 | 7918300 | 7916z00 | 7916y00 | 7915y00 | 7917.00 | 282 |
| 7916200                                 | 7912z00 | 7912y00 | 7913y00 | 7910411 | 791D100 | 7911411 | 791D000 | 7912.12 | 791D.00 | 292 |
| 7913z00                                 | 7918500 | 7913411 | 7914y00 | 7912511 | 7918400 | 7912500 | 7917200 | 7917y00 | 7915z00 | 302 |
| 7914411                                 | 7919200 | 791Dy00 |         |         |         |         |         |         |         | 305 |
| <b>OPCS4:</b>                           | K25     | K255    | K258    | K259    | K26     | K265    | K268    | K269    | K27     | 314 |
| K275                                    | K276    | K278    | K279    | K28     | K285    | K288    | K289    | K29     | K295    | 324 |
| K298                                    | K299    | K30     | K301    | K302    | K303    | K304    | K308    | K309    | K31     | 334 |
| K311                                    | K312    | K313    | K314    | K318    | K319    | K32     | K321    | K322    | K323    | 344 |
| K324                                    | K328    | K329    | K34     | K341    | K342    | K343    | K344    | K345    | K346    | 354 |
| K348                                    | K349    | K35     | K351    | K352    | K353    | K354    | K355    | K356    | K358    | 364 |
| K359                                    | K36     | K361    | K362    | K368    | K369    |         |         |         |         | 370 |

| Warfarin prescription codes |       |       |       |       |       |       |       |       |       |     |
|-----------------------------|-------|-------|-------|-------|-------|-------|-------|-------|-------|-----|
| <b>BNF:</b>                 | 45    | 61    | 833   | 1781  | 6262  | 8466  | 8467  | 13348 | 17965 | 379 |
| 23078                       | 30202 | 30203 | 31511 | 31937 | 33711 | 34019 | 34086 | 34087 | 34088 | 389 |
| 34095                       | 34299 | 34416 | 34417 | 34418 | 34517 | 34526 | 34576 | 34691 | 34758 | 399 |
| 34864                       | 34918 | 36099 | 38041 | 38044 | 39866 | 40143 |       |       |       | 406 |

**Note:** final table column gives the cumulative total number of identified codes.

**Table S2 AF subtype and absolute risk of stroke, systemic embolism, and all-cause mortality(per 100 person-years).**

| Sub-types of patients with AF | Absolute risk     |                          |                                       |                            | Risk difference<br>vs no VHD |
|-------------------------------|-------------------|--------------------------|---------------------------------------|----------------------------|------------------------------|
|                               | unadjusted        | Model 1:<br>age adjusted | Model 2:<br>age- and sex-<br>adjusted | Model 3:<br>fully adjusted |                              |
| no valvular heart disease     | 13.3 [13.2, 13.5] | 16.8 [16.6, 17.0]        | 16.8 [16.6, 17.1]                     | 18.2 [18.0, 18.4]          |                              |
| Any heart valve disease       | 15.0 [14.5, 15.5] | 20.2 [19.6, 20.9]        | 20.4 [19.7, 21.0]                     | 20.1 [19.5, 20.8]          | 1.9 [1.0, 2.9]               |
| mechanical replacement        | 9.9 [9.0, 10.8]   | 19.6 [17.8, 21.4]        | 19.7 [17.9, 21.5]                     | 20.2 [18.4, 22.1]          | 2.0 [-0.3, 4.4]              |
| bioprosthetic replacement     | 12.4 [10.8, 13.9] | 13.9 [12.1, 15.7]        | 13.8 [12.1, 15.6]                     | 13.9 [12.1, 15.7]          | -4.3 [-6.8, -1.7]            |
| valve repair                  | 8.1 [6.7, 9.5]    | 14.6 [12.0, 17.2]        | 14.9 [12.3, 17.6]                     | 15.3 [12.5, 18.0]          | -2.9 [-6.3, 0.4]             |
| mitral stenosis               | 13.5 [11.9, 15.2] | 21.3 [18.7, 24.0]        | 22.4 [19.6, 25.2]                     | 22.4 [19.6, 25.2]          | 4.2 [0.5, 7.9]               |
| mitral regurgitation          | 15.0 [14.1, 15.9] | 19.3 [18.1, 20.4]        | 19.5 [18.3, 20.7]                     | 19.1 [18.0, 20.3]          | 0.9 [-0.7, 2.6]              |
| mitral disorder nos           | 16.4 [14.9, 18.0] | 21.0 [19.0, 23.0]        | 21.2 [19.2, 23.3]                     | 20.7 [18.7, 22.7]          | 2.5 [-0.1, 5.1]              |
| aortic stenosis               | 25.9 [24.1, 27.7] | 25.5 [23.7, 27.3]        | 25.5 [23.7, 27.2]                     | 24.6 [22.9, 26.3]          | 6.4 [4.1, 8.7]               |
| aortic regurgitation          | 16.8 [14.5, 19.0] | 21.4 [18.5, 24.2]        | 21.4 [18.5, 24.3]                     | 20.9 [18.1, 23.7]          | 2.7 [-1.1, 6.6]              |
| aortic disorder nos           | 17.7 [14.1, 21.2] | 20.0 [15.9, 24.0]        | 19.9 [15.9, 24.0]                     | 20.9 [16.7, 25.1]          | 2.7 [-3.1, 8.5]              |

**Table S3. Recorded echocardiography rates by age group(1998-2010).**

| Year | Rate of recorded echocardiogram (%) |       |       |      |
|------|-------------------------------------|-------|-------|------|
|      | Age group(years)                    |       |       |      |
|      | <65                                 | 65-74 | 74-84 | ≥85  |
| 1998 | 5.5                                 | 7.0   | 4.3   | 1.8  |
| 1999 | 9.1                                 | 10.1  | 5.8   | 2.9  |
| 2000 | 12.0                                | 13.0  | 9.2   | 4.5  |
| 2001 | 15.5                                | 17.7  | 12.6  | 6.5  |
| 2002 | 20.7                                | 21.5  | 17.4  | 9.9  |
| 2003 | 27.5                                | 29.0  | 23.6  | 14.4 |
| 2004 | 37.4                                | 37.7  | 32.8  | 21.9 |
| 2005 | 45.8                                | 45.9  | 40.0  | 26.9 |
| 2006 | 51.4                                | 53.8  | 47.3  | 32.4 |
| 2007 | 57.1                                | 60.4  | 54.6  | 37.5 |
| 2008 | 61.5                                | 64.4  | 62.7  | 44.3 |
| 2009 | 65.4                                | 69.0  | 67.7  | 48.3 |

Figure S1 Quality of recording valvular heart diseases in electronic health records in 1998 to 2010: specified heart valves

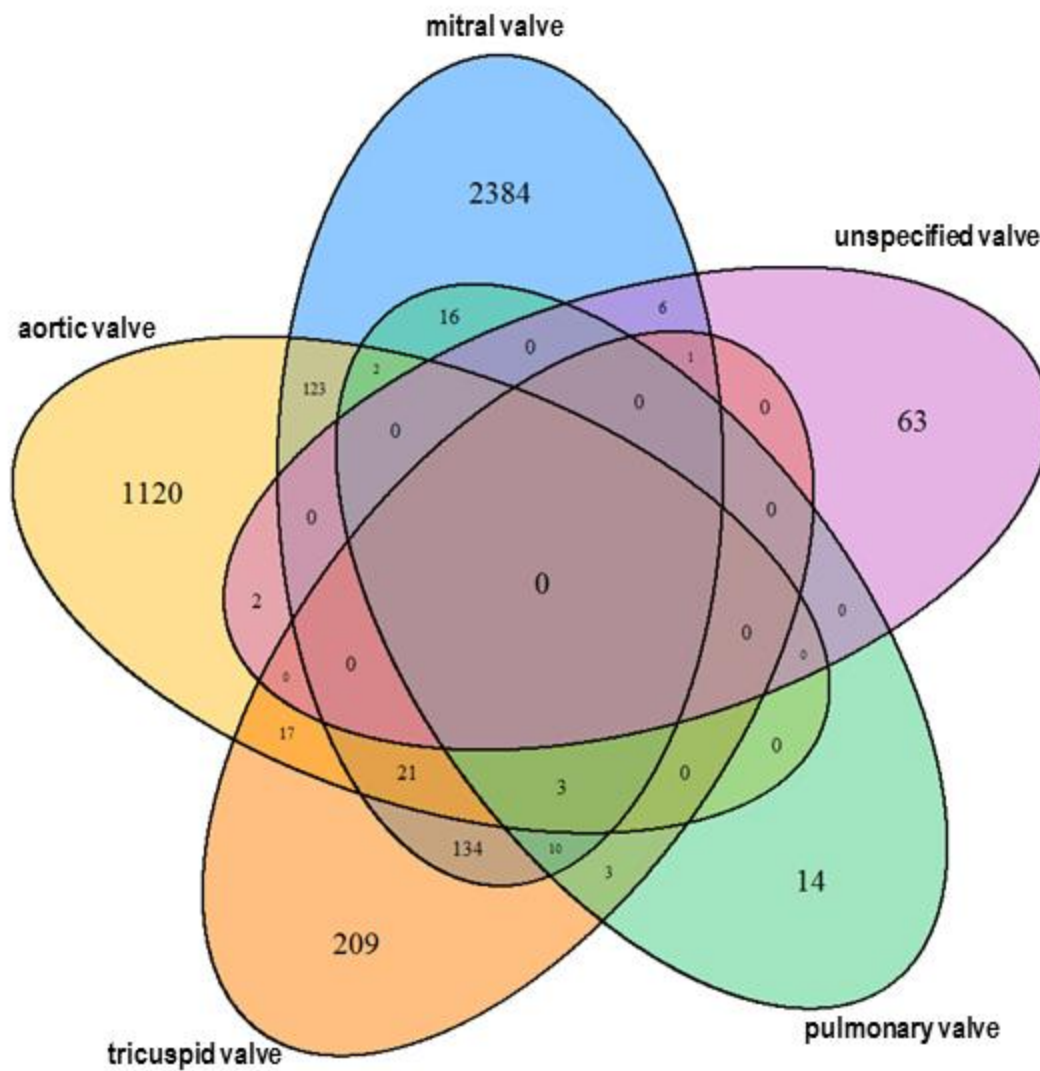

**Figure S2 Quality of recording valvular heart diseases in electronic health records in 1998 to 2010: mechanical vs. bioprosthetic valve replacements**

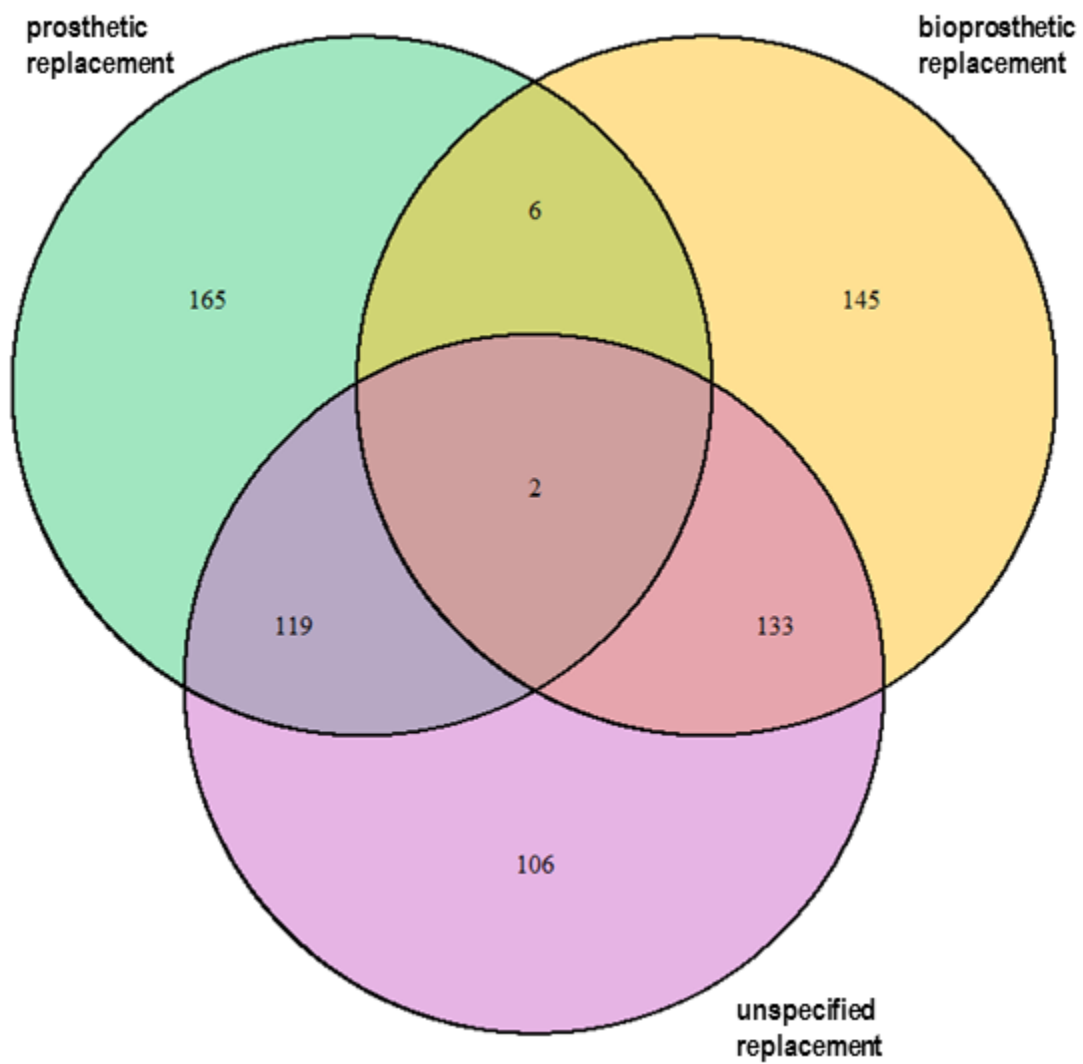

Figure S3 Quality of recording valvular heart diseases in electronic health records in 1998 to 2010: rheumatic vs. non-rheumatic valve disorders

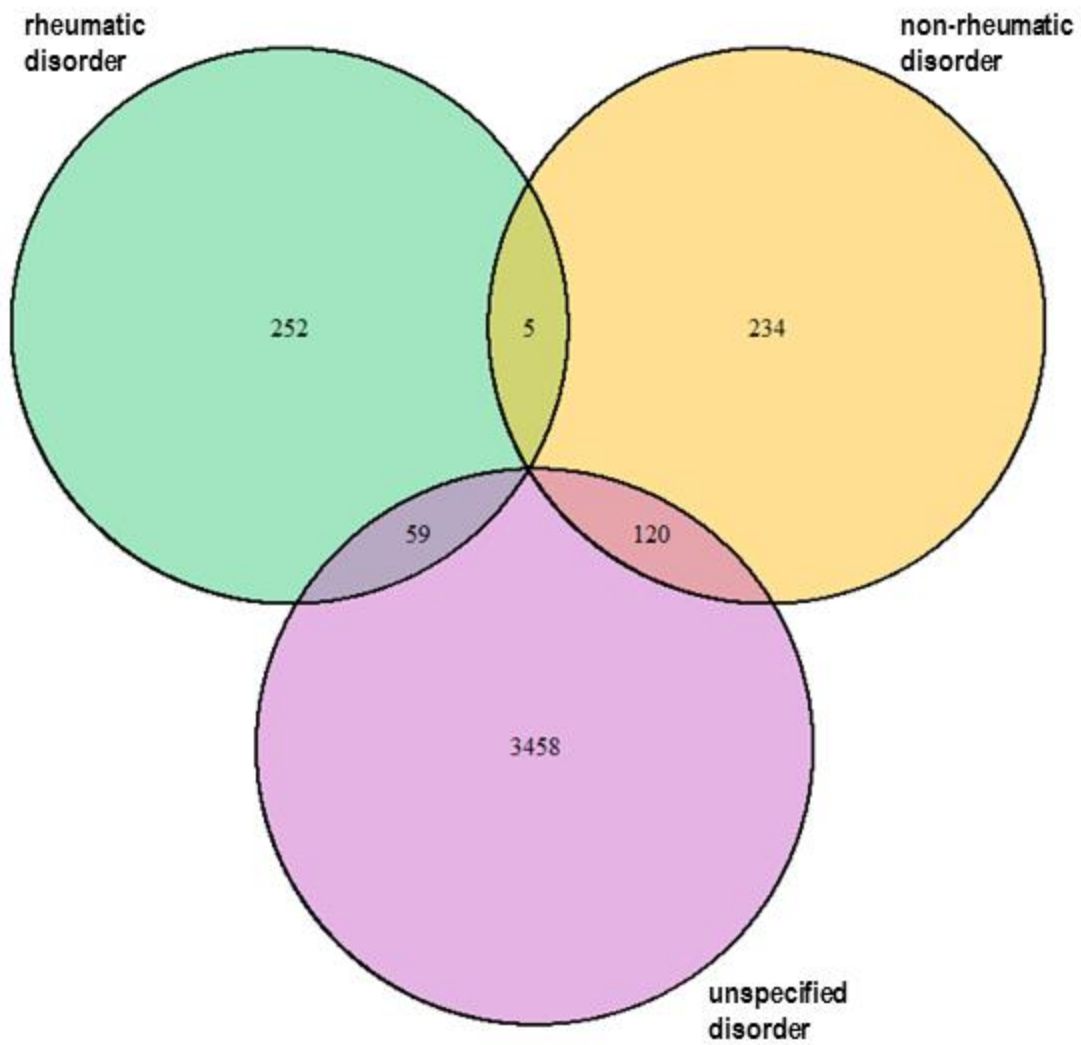



**Figure S4 Differences in age distributions in individuals with mechanical, bioprosthetic and unspecified valve codes**

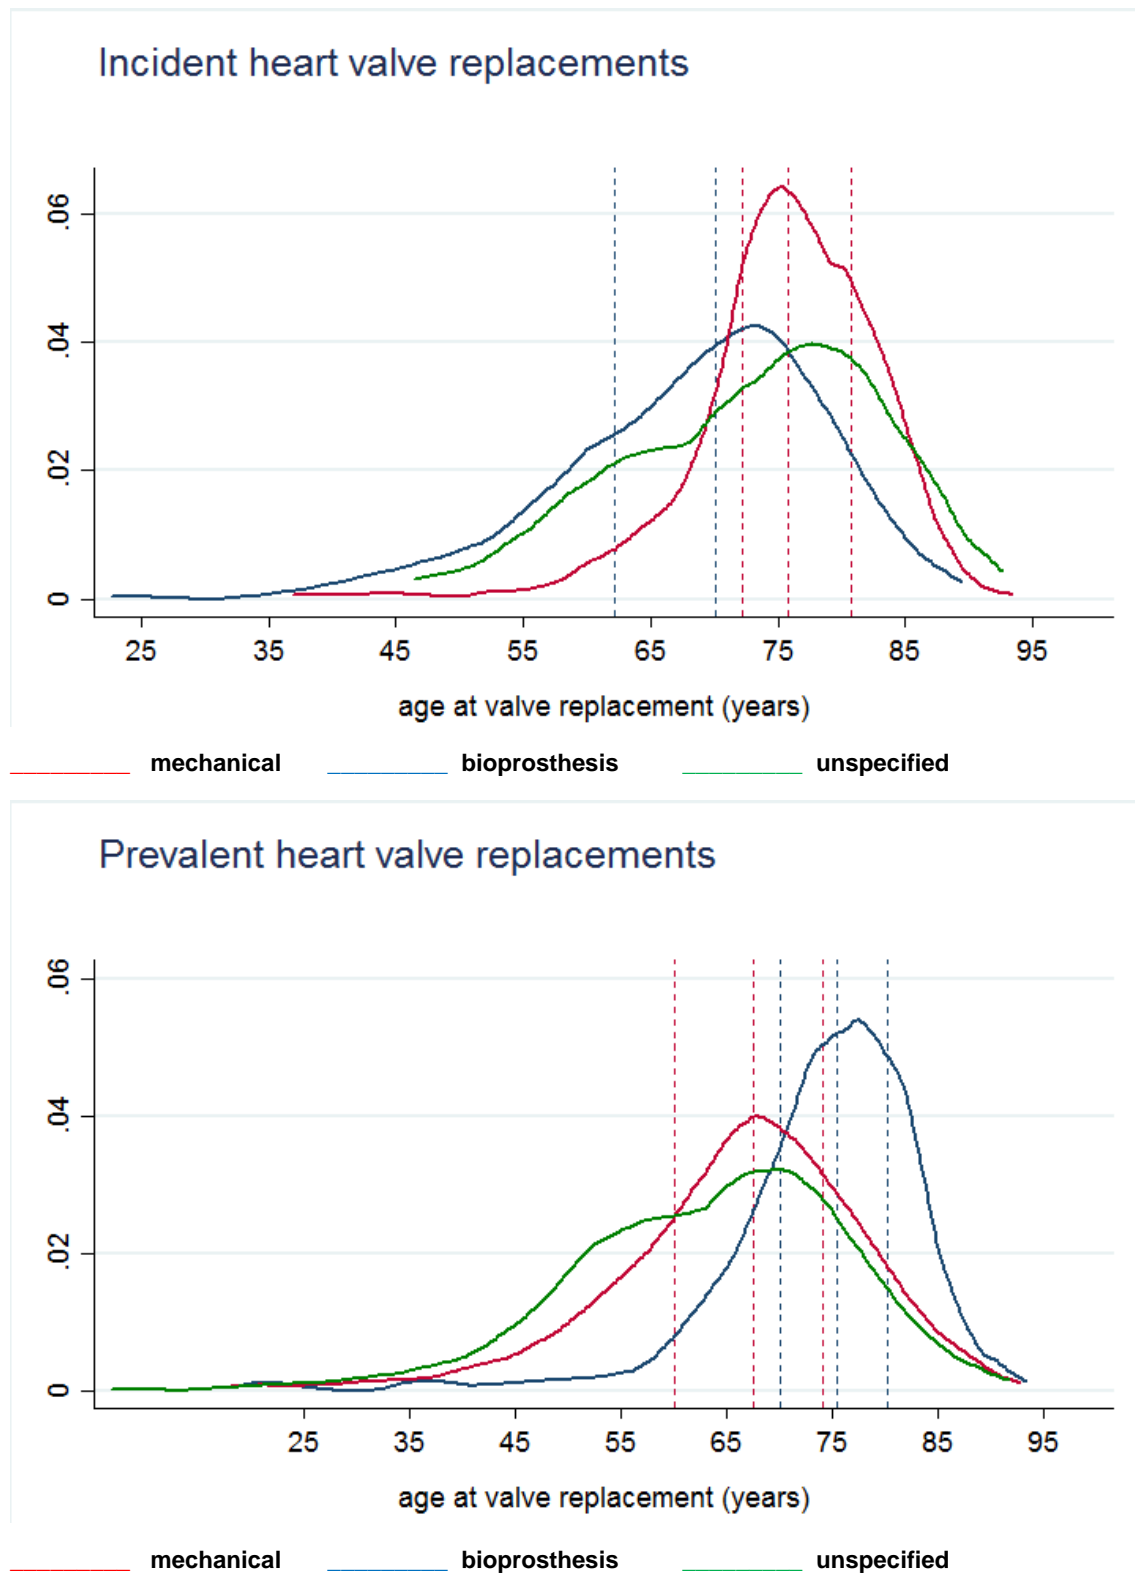

**Notes:** vertical dashed lines represent median and interquartile interval values showing overlap in the age distributions for individuals with mechanical and bioprosthetic valve replacements between the ages 70 to 75 years.
